# Supplementary material for: CD8+ T Cells in OA Knee Joints Are Differentiated into Subsets Depending on OA Stage and Compartment
Source: MDPI journal article supplement (doi:10.3390/jcm11102814), 2022-05-17
Supplement: s1 [file jcm-1661785-Supplementary.pdf › jcm-1661785-Supplementary.pdf]

Supplementary Table S1. Clinical features of the early OA group.

| Time from onset of symptoms/trauma to operation in months, <i>n</i> (%) |  |               |
|-------------------------------------------------------------------------|--|---------------|
| 1-3                                                                     |  | 2 (14.3 %)    |
| 4-6                                                                     |  | 4 (28.5 %)    |
| 7-9                                                                     |  | 3 (21.4 %)    |
| 10-12                                                                   |  | 2 (14.3 %)    |
| >12                                                                     |  | 3 (21.4 %)    |
| <b>ICRS grade</b>                                                       |  |               |
| I-IV in ≥ 2 compartments                                                |  | 2 (14.3 %)    |
| II-IV in 1 compartment                                                  |  | 12 (85.7 %)   |
| <b>Pathology, <i>n</i> (%)</b>                                          |  |               |
| Meniscus tear                                                           |  | 5/14 (35.7 %) |
| ACL tear                                                                |  | 2/14 (14.3 %) |
| Localized cartilage damage                                              |  | 7/14 (50 %)   |

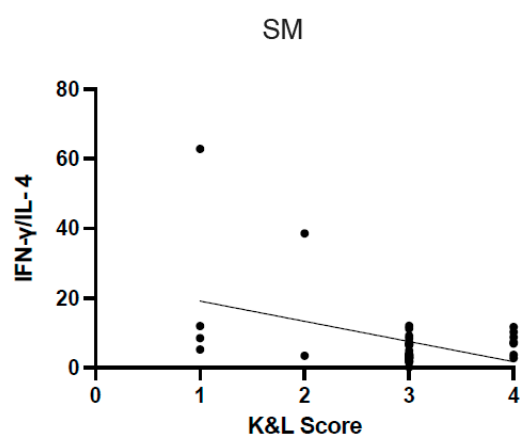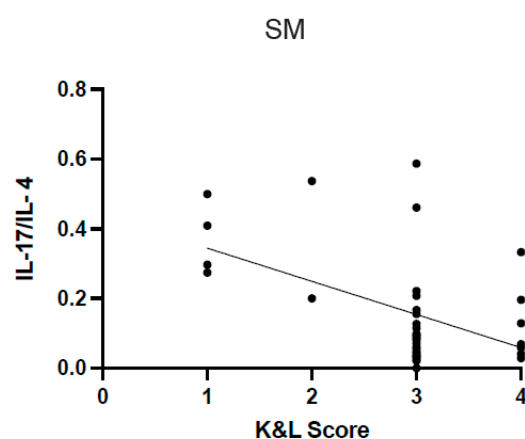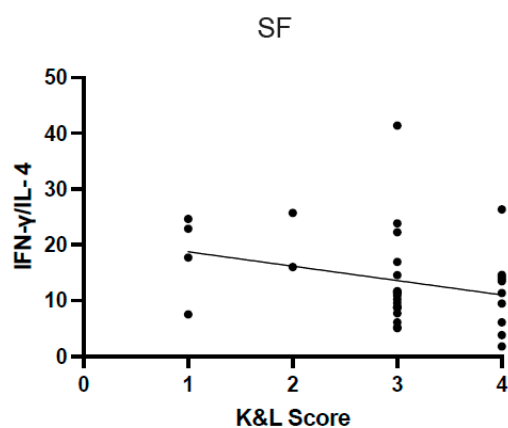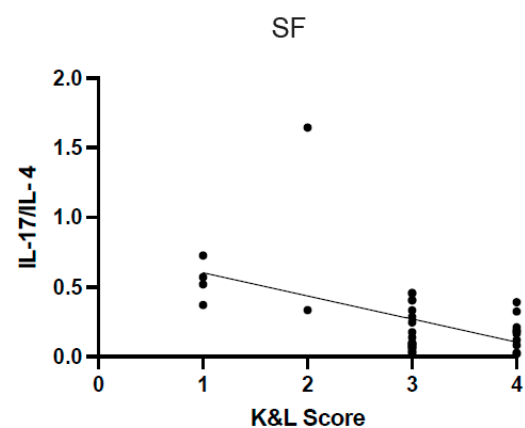

**Supplementary Figure S1: Correlation analysis of inflammatory polarization of CD8<sup>+</sup> T cell subsets and OA grade.**

Correlation plots of (CD8<sup>+</sup>IFN- $\gamma$ <sup>+</sup>/CD8<sup>+</sup>IL-4<sup>+</sup>) / K&L Score and (CD8<sup>+</sup>IL-17A<sup>+</sup>/CD8<sup>+</sup>IL-4<sup>+</sup>) / K&L Score and linear regression lines are shown.

In brief in samples of synovial fluid (SF) and synovial membrane (SM), inflammatory polarization of CD8<sup>+</sup> T cell subsets, defined as ratio of pro-inflammatory Tc1 (CD8<sup>+</sup>IFN- $\gamma$ <sup>+</sup>) or Tc17 (CD8<sup>+</sup>IL17A<sup>+</sup>) and anti-inflammatory Tc2 (CD8<sup>+</sup>IL-4<sup>+</sup>) was correlated with OA grade defined by K&L score (Kellgren and Lawrence score).

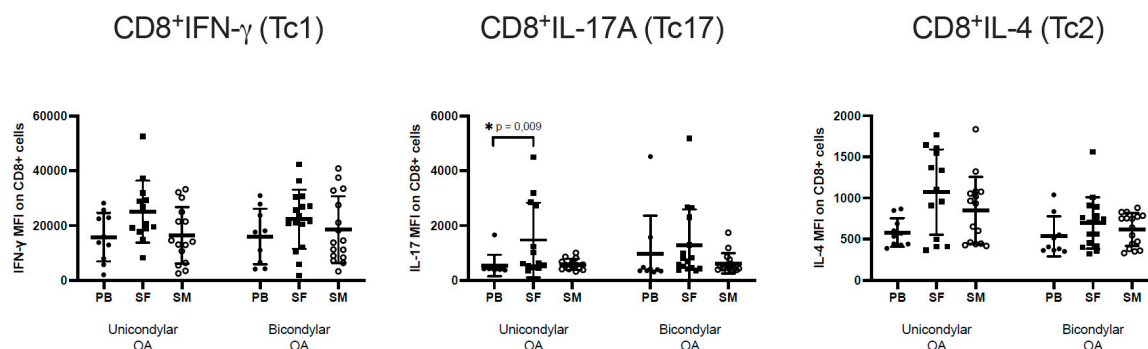

**Supplementary Figure S2: Comparison of CD8<sup>+</sup> T cell subset MFI values for uni- and bicondylar OA.** MFI values of CD8<sup>+</sup> T cell subsets Tc1, Tc17 and Tc2 are presented for uni- and bicompartmental OA, depending on joint compartment. In short, multi-color flow cytometry was used to identify CD8<sup>+</sup> T cell subsets in peripheral blood (PB), synovial fluid (SF) and synovial membrane (SM) by their preferential expression of extracellular and intracellular markers. Significant differences are indicated by asterisks: \*p $\leq$  0.05.
